# Supplementary material
Source: PubMed Central journal article supplement (PMC6058797)
Supplement: 2017.178590.VIAL_SUPPL.pdf [file 2017.178590.VIAL_SUPPL.pdf]

**Down syndrome-like acute megakaryoblastic leukemia in a patient with Cornelia de Lange syndrome**

Yoann Vial,<sup>1,2,3</sup> Julie Lachenaud,<sup>4</sup> Alain Verloes,<sup>1,2,5</sup> Marianne Besnard,<sup>6</sup> Odile Fenneteau,<sup>7</sup> Elodie Lainey,<sup>2,3,7</sup> Alice Marceau-Renaut,<sup>8,9</sup> Claude Preudhomme,<sup>8,9</sup> André Baruchel,<sup>2,4</sup> Hélène Cavé<sup>1,2,3</sup> and Séverine Drunat<sup>1,5</sup>

<sup>1</sup>Assistance Publique des Hôpitaux de Paris (AP-HP), Hôpital Robert Debré, Département de Génétique, France; <sup>2</sup>Université Paris Diderot, Paris Sorbonne Cité, France; <sup>3</sup>INSERM UMR 1131, Institut Universitaire d'Hématologie, Paris, France; <sup>4</sup>Assistance Publique des Hôpitaux de Paris (AP-HP), Hôpital Robert Debré, Service d'Hématologie Pédiatrique, France; <sup>5</sup>INSERM UMR 1141, Hôpital Robert Debré, Paris, France; <sup>6</sup>Centre Hospitalier de Polynésie Française (CHPF), Service de Réanimation néonatale et Néonatalogie, Papeete, Tahiti; <sup>7</sup>Assistance Publique des Hôpitaux de Paris (AP-HP), Hôpital Robert Debré, Service d'Hématologie Biologique, France; <sup>8</sup>CHU Lille, Laboratoire d'hématologie, France and <sup>9</sup>INSERM, UMR-S 1172, France.

Correspondence: [severine.drunat@aphp.fr](mailto:severine.drunat@aphp.fr)  
doi:10.3324/haematol.2017.178590

**Supplementary table S1: List of SNVs and Indels identified by WES (whole exome sequencing) or targeted sequencing at D15 and acute megakaryoblastic leukemia (AMKL) stages**

Relevant SNVs (Small Nucleotide Variation), Indels (Insertion/deletion) were called by eliminating the following entries: synonymous variants, inherited variants, variants with allele frequency > 1% in ExAC, ESP6500 or our in-house database unless they were registered as pathogenic in COSMIC, ClinVar, or HGMD. Mean depth of exome sequencing; patient: 97X, father: 80X, mother: 94X.

| Gene         | RefSeq      | Mutation type | Nucleotide change | Amino Acid Change | D15 sample (WES)<br>Mean depth: 97X |      | D15 sample<br>(Targeted sequencing) |      | AMKL sample<br>(Targeted sequencing) |      |
|--------------|-------------|---------------|-------------------|-------------------|-------------------------------------|------|-------------------------------------|------|--------------------------------------|------|
|              |             |               |                   |                   | Sequencing depth                    | VAF  | Sequencing depth                    | VAF  | Sequencing depth                     | VAF  |
| <i>NIPBL</i> | NM_015384.4 | splice        | c.6344-2A>G       | p.?               | 167X                                | 0,31 | 47X                                 | 0,28 | 72X                                  | 0,44 |
| <i>GATA1</i> | NM_002049.3 | frameshift    | c.44dupT          | p.Gln17Profs*23   | 52X                                 | 0,38 | 51X                                 | 0,53 | 52X                                  | 0,84 |
| <i>EZH2</i>  | NM_004456.4 | deletion      | c.46_48delCGG     | p.Arg16del        | 150X                                | 0    | 142X                                | 0    | 107X                                 | 0,64 |
| <i>NRAS</i>  | NM_002524.4 | missense      | c.436G>A          | p.Ala146Thr       | 148X                                | 0    | 105X                                | 0    | 127X                                 | 0,37 |
| <i>JAK1</i>  | NM_002227.2 | missense      | c.2879C>G         | p.Pro960Arg       | 68X                                 | 0    | 139X                                | 0    | 132X                                 | 0,3  |

**Supplementary table S2: List of CNVs and LOH (loss of heterozygosity) identified by CGH + SNP array at D15 and AMKL stages**

Relevant CNVs (Copy Number Variation) were called by eliminating the CNVs overlapping more than 80% with regions seen at least 6 times in Benign consensus regions from ISCA CNV Atlas (bISCAr4) or the consensus region of the core DGV set (cDGVc7) or our in-house database unless they were registered as pathogenic in COSMIC, ClinVar, or HGMD.

| D15 Sample         |            |          |          |           |             |           | AMKL Sample        |            |           |           |           |              |           |
|--------------------|------------|----------|----------|-----------|-------------|-----------|--------------------|------------|-----------|-----------|-----------|--------------|-----------|
| Type of alteration | Chromosome | Start    | Stop     | Size (bp) | Cytoband    | Log ratio | Type of alteration | Chromosome | Start     | Stop      | Size (bp) | Cytoband     | Log ratio |
| LOH                | chr2       | 16815759 | 22832449 | 6016691   | p24.2-p24.1 | -         | LOH                | chr1       | 71044680  | 75229396  | 4184717   | p31.1        | -         |
| LOH                | chr2       | 39863386 | 42432323 | 2568938   | p22.1-p21   | -         | Duplication        | chr1       | 160740134 | 249212668 | 88472535  | q23.3-q44    | 0.443654  |
| LOH                | chr3       | 62808969 | 65639369 | 2830401   | p14.2-p14.1 | -         | LOH                | chr2       | 16815759  | 22832449  | 6016691   | p24.2-p24.1  | -         |
| LOH                | chr3       | 73004580 | 75257002 | 2252423   | p13-p12.3   | -         | LOH                | chr2       | 39863386  | 42981239  | 3117854   | p22.1-p21    | -         |
| Gain               | chr21      | 14671461 | 48090317 | 33418857  | q11.2-q22.3 | 0.290654  | LOH                | chr3       | 62808969  | 65639369  | 2830401   | p14.2-p14.1  | -         |
|                    |            |          |          |           |             |           | LOH                | chr3       | 69627921  | 75257002  | 5629082   | p14.1-p12.3  | -         |
|                    |            |          |          |           |             |           | LOH                | chr4       | 48354057  | 48907122  | 553066    | p11          | -         |
|                    |            |          |          |           |             |           | LOH                | chr4       | 52780048  | 56778197  | 3998150   | q12          | -         |
|                    |            |          |          |           |             |           | Duplication        | chr6       | 163083    | 46188827  | 46025745  | p25.3-p21.1  | 0.419427  |
|                    |            |          |          |           |             |           | LOH                | chr7       | 98400599  | 158885928 | 60485330  | q22.1-q36.3  | -         |
|                    |            |          |          |           |             |           | Deletion           | chr7       | 100186998 | 159125464 | 58938467  | q22.1-q36.3  | -0.615681 |
|                    |            |          |          |           |             |           | Duplication        | chr8       | 191530    | 146274835 | 43516763  | p23.3-q24.3  | 0.461938  |
|                    |            |          |          |           |             |           | Duplication        | chr9       | 204193    | 15680753  | 15476561  | p24.3-p22.3  | 0.403025  |
|                    |            |          |          |           |             |           | LOH                | chr11      | 4659187   | 6658270   | 1999084   | p15.4        | -         |
|                    |            |          |          |           |             |           | LOH                | chr11      | 44081150  | 51505725  | 7424576   | p11.2-p11.12 | -         |
|                    |            |          |          |           |             |           | LOH                | chr11      | 55196818  | 57448032  | 2251215   | q11-q12.1    | -         |
|                    |            |          |          |           |             |           | Duplication        | chr19      | 27984957  | 59095418  | 31110462  | q11-q13.43   | 0.390872  |
|                    |            |          |          |           |             |           | Duplication        | chr21      | 14458104  | 48090317  | 33632214  | q11.2-q22.3  | 0.450052  |
