# Supplementary material
Source: PubMed Central journal article supplement (PMC6058797)
Supplement: 2017_178590-Disclosures_and_Contributions.pdf [file 2017_178590-Disclosures_and_Contributions.pdf]

Haematologica  
HAEMATOL/2017/178590  
Version 3

Down-syndrome-like acute megakaryoblastic leukemia in a patient with  
Cornelia de Lange syndrome

Yoann Vial, Julie Lachenaud, Alain Verloes, Marianne Besnard, Odile  
Fenneteau, Elodie Lainey, Alice Marceau-Renaut, Claude  
Preudhomme, André Baruchel, H el ene Cav e, and S everine Drunat

Disclosures: none

Contributions: YV and SD performed experiments and interpreted the data. SD and HC wrote the manuscript. OF and EL performed cytomorphologic and immunophenotypic analysis. AMR and CP provided AML expertise. JL, AV, MB and AB treated the patients, collected the samples and provided patient data. All authors read and approved the manuscript.
